# Supplementary material for: Biomarker discovery: quantification of microRNAs and other small non-coding RNAs using next generation sequencing
Source: PubMed Central journal article supplement (PMC4487992; doi:10.1186/s12920-015-0109-x), 2015-07-01

# Supplementary Figure 1

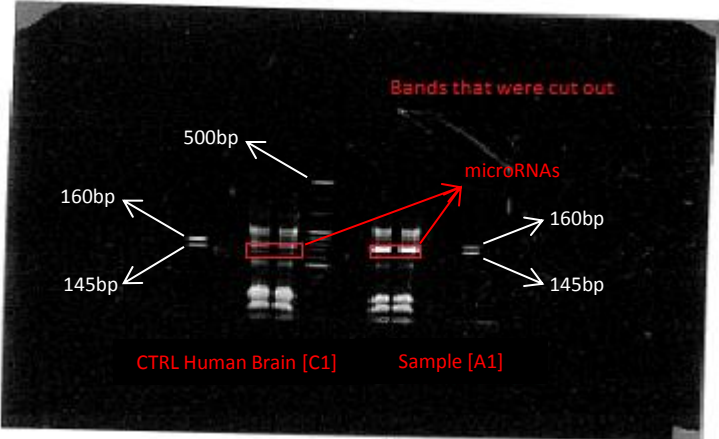

1

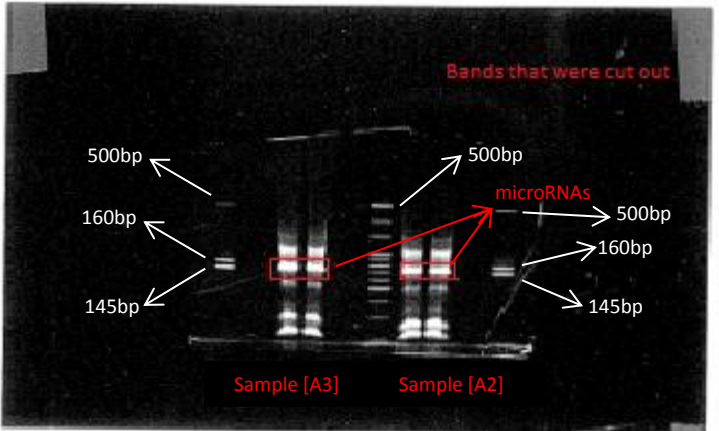

2

# Supplementary Figure 2

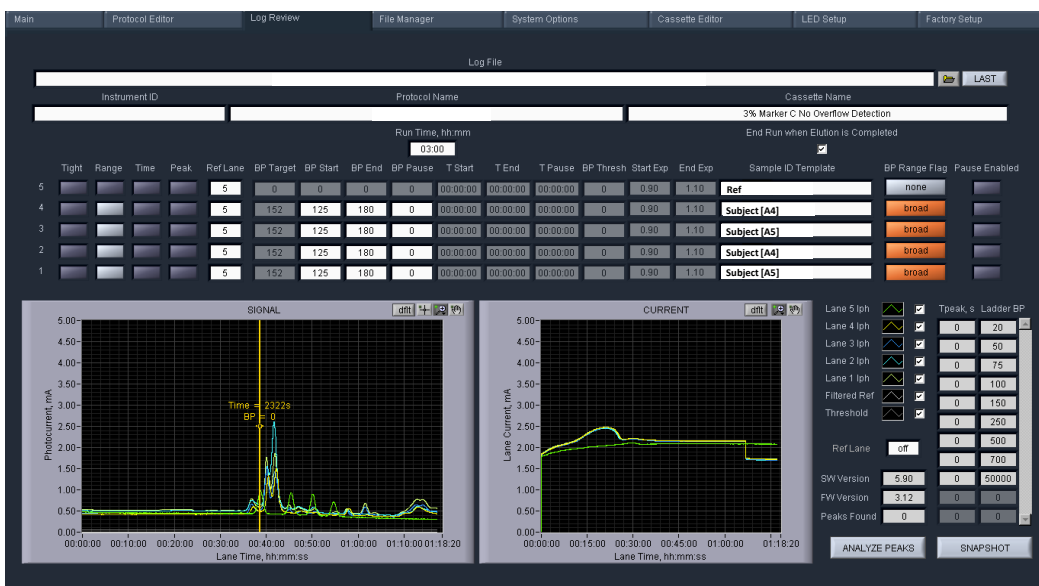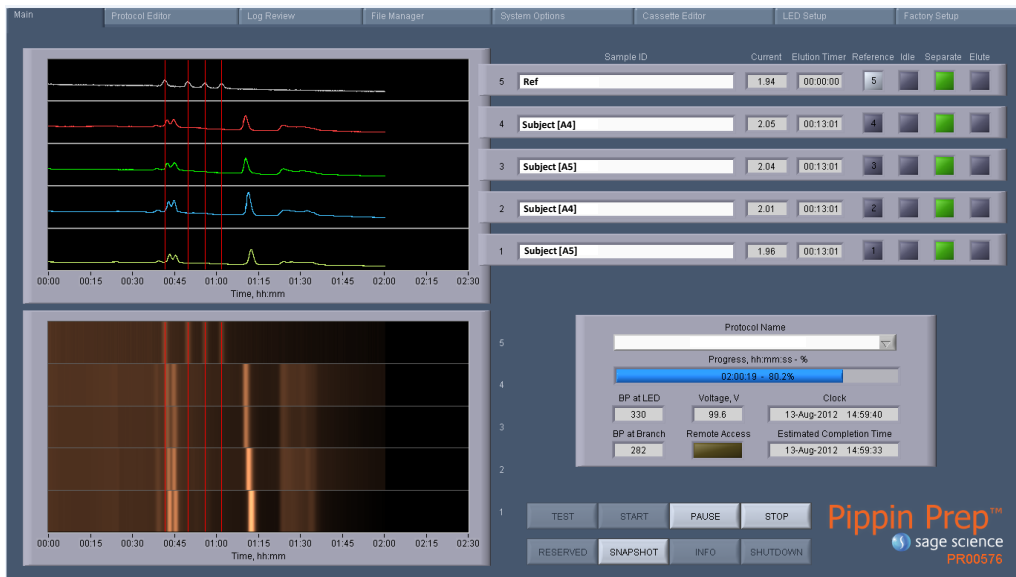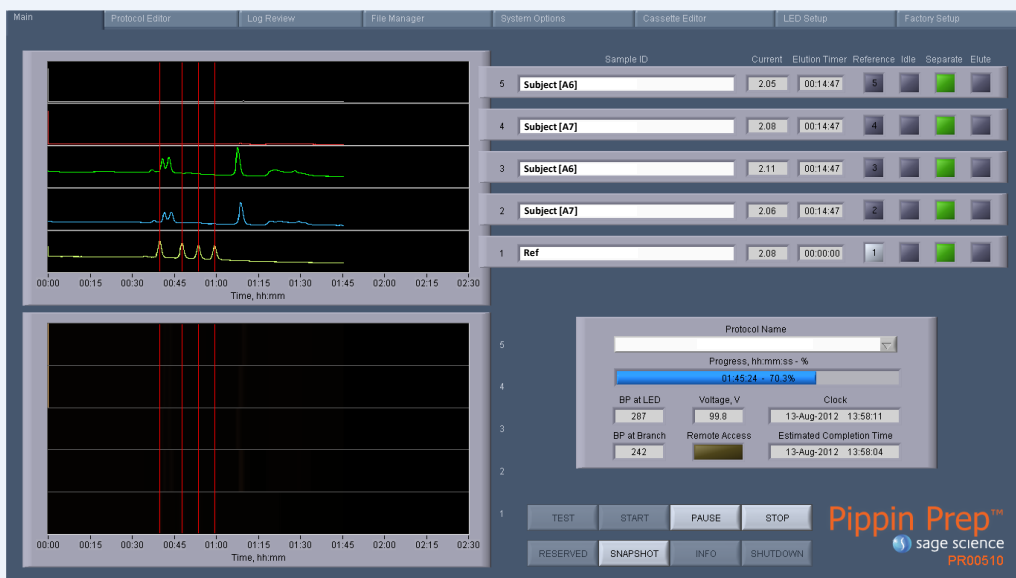

# Supplementary Figure 3

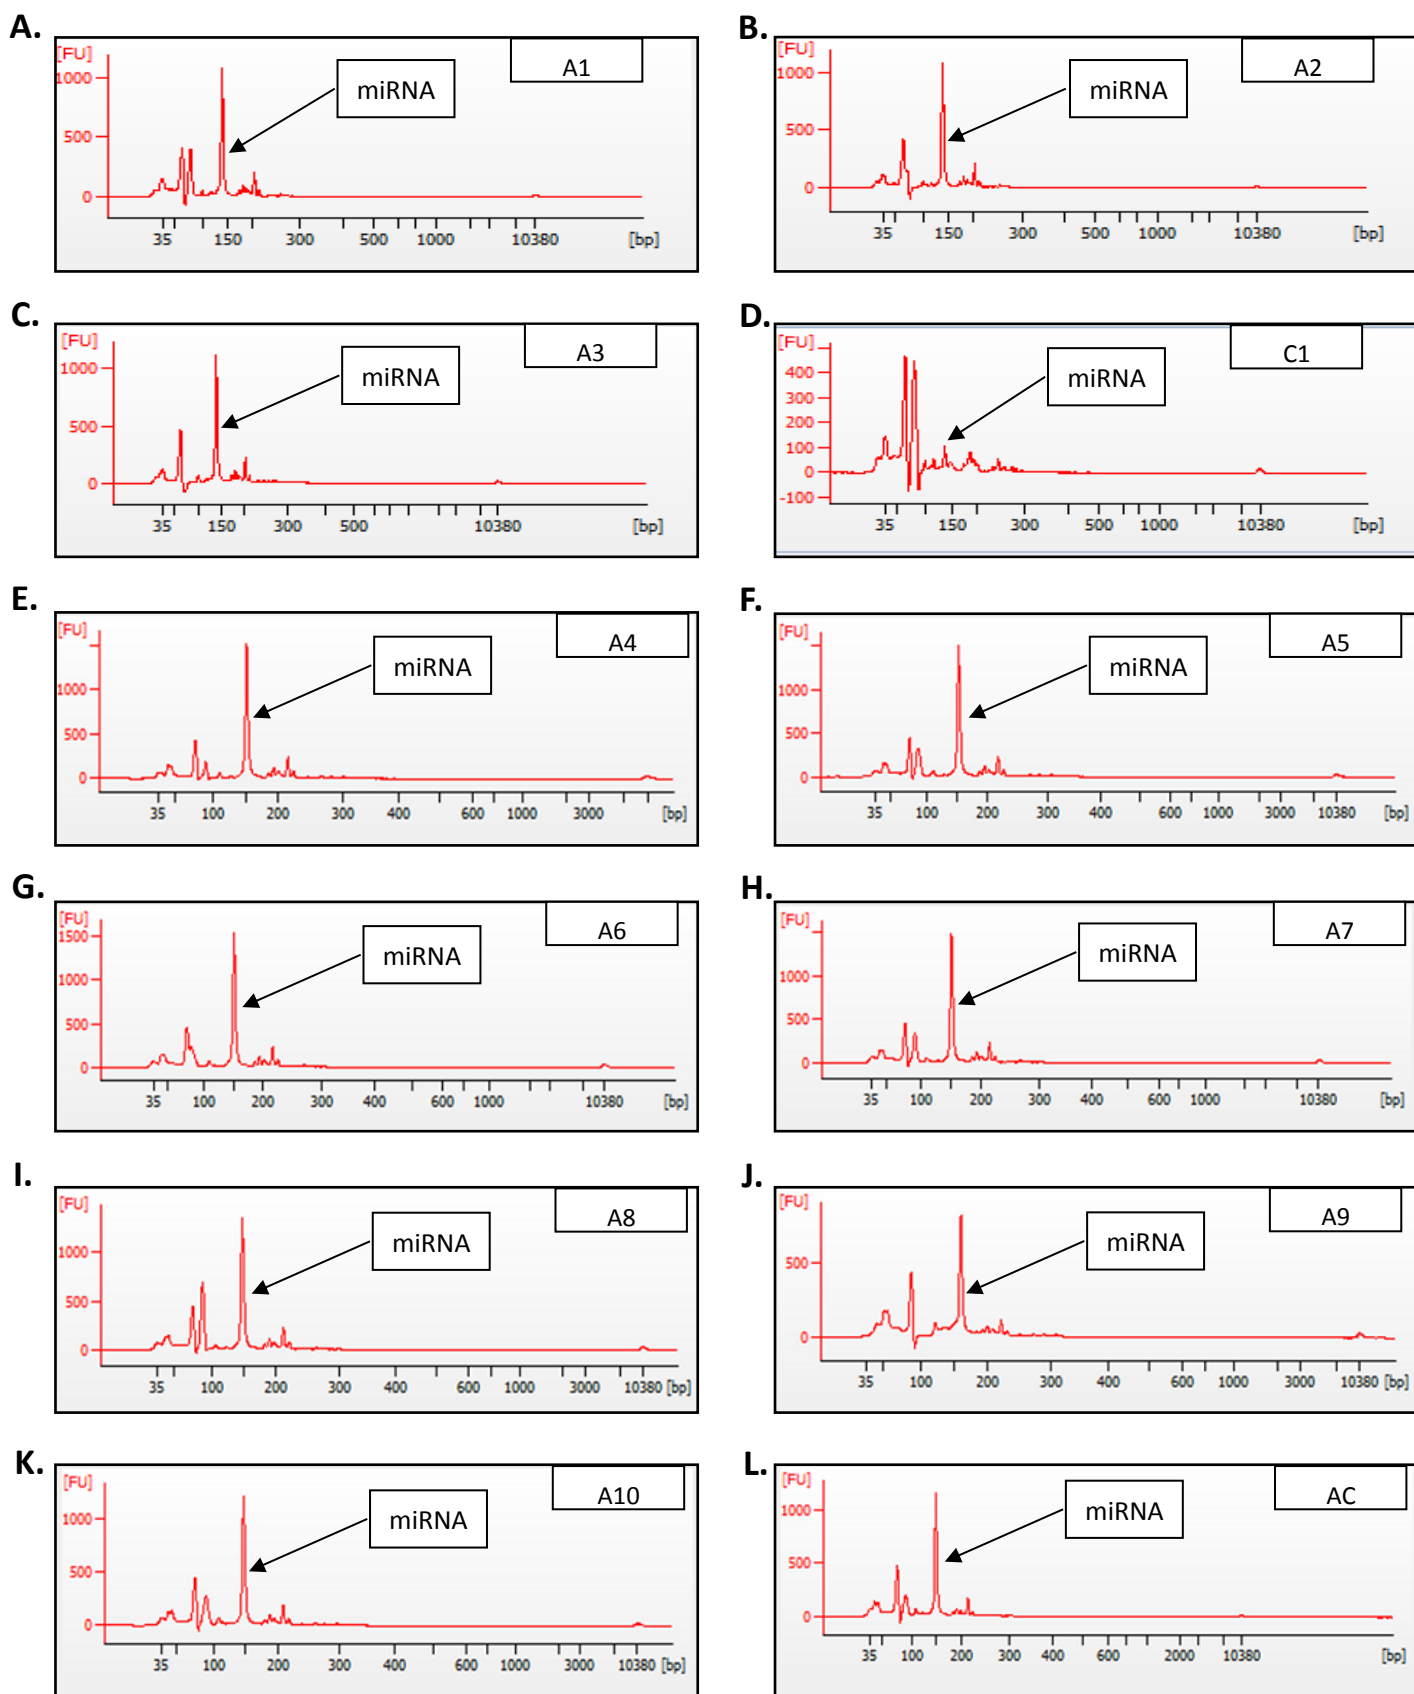

# Supplementary Figure 4

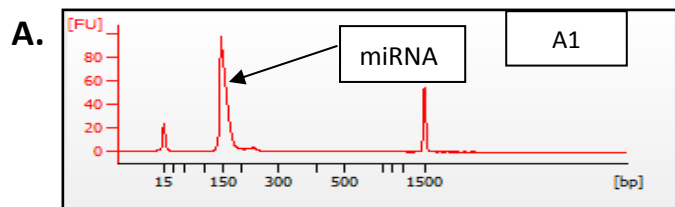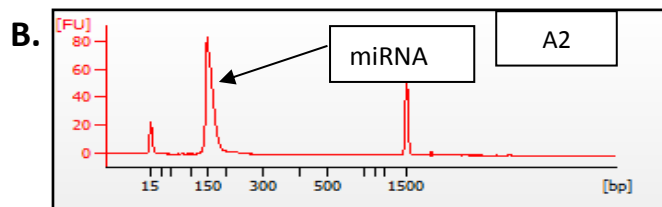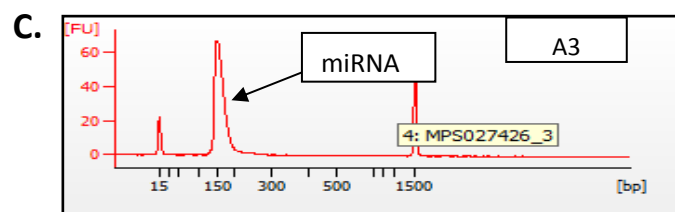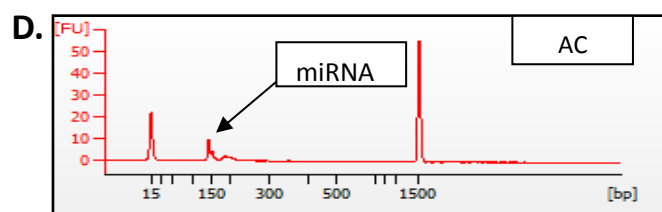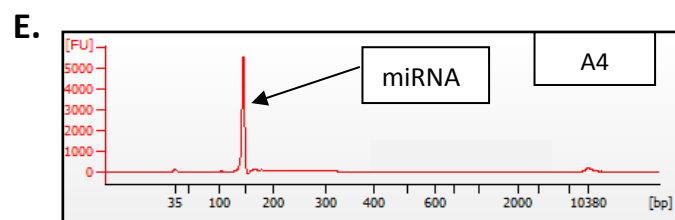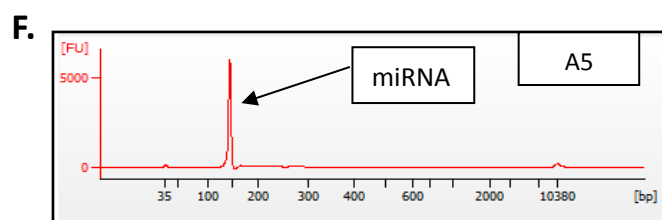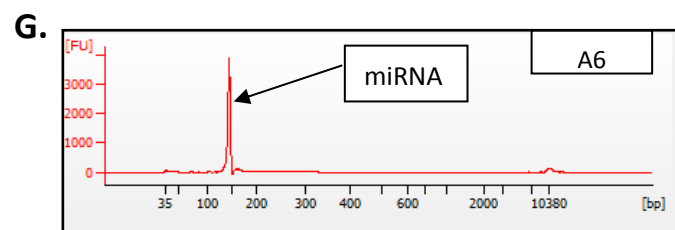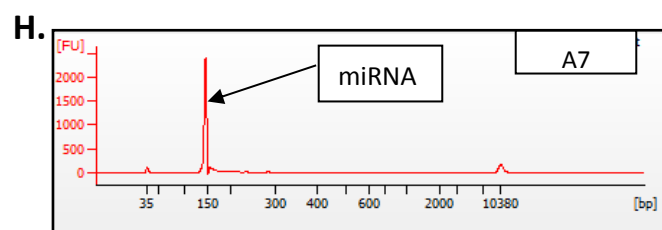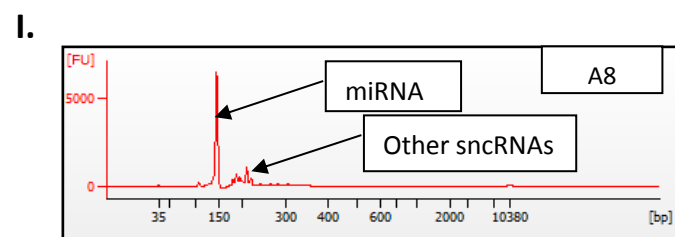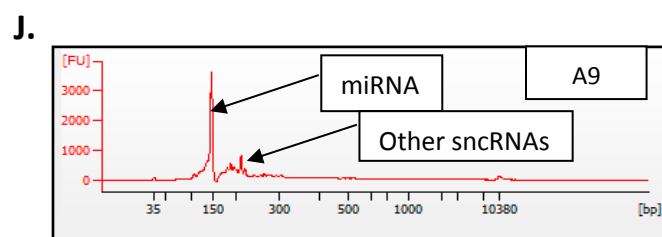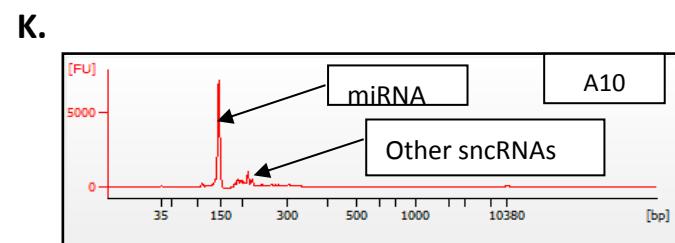

# Supplementary Figure 5

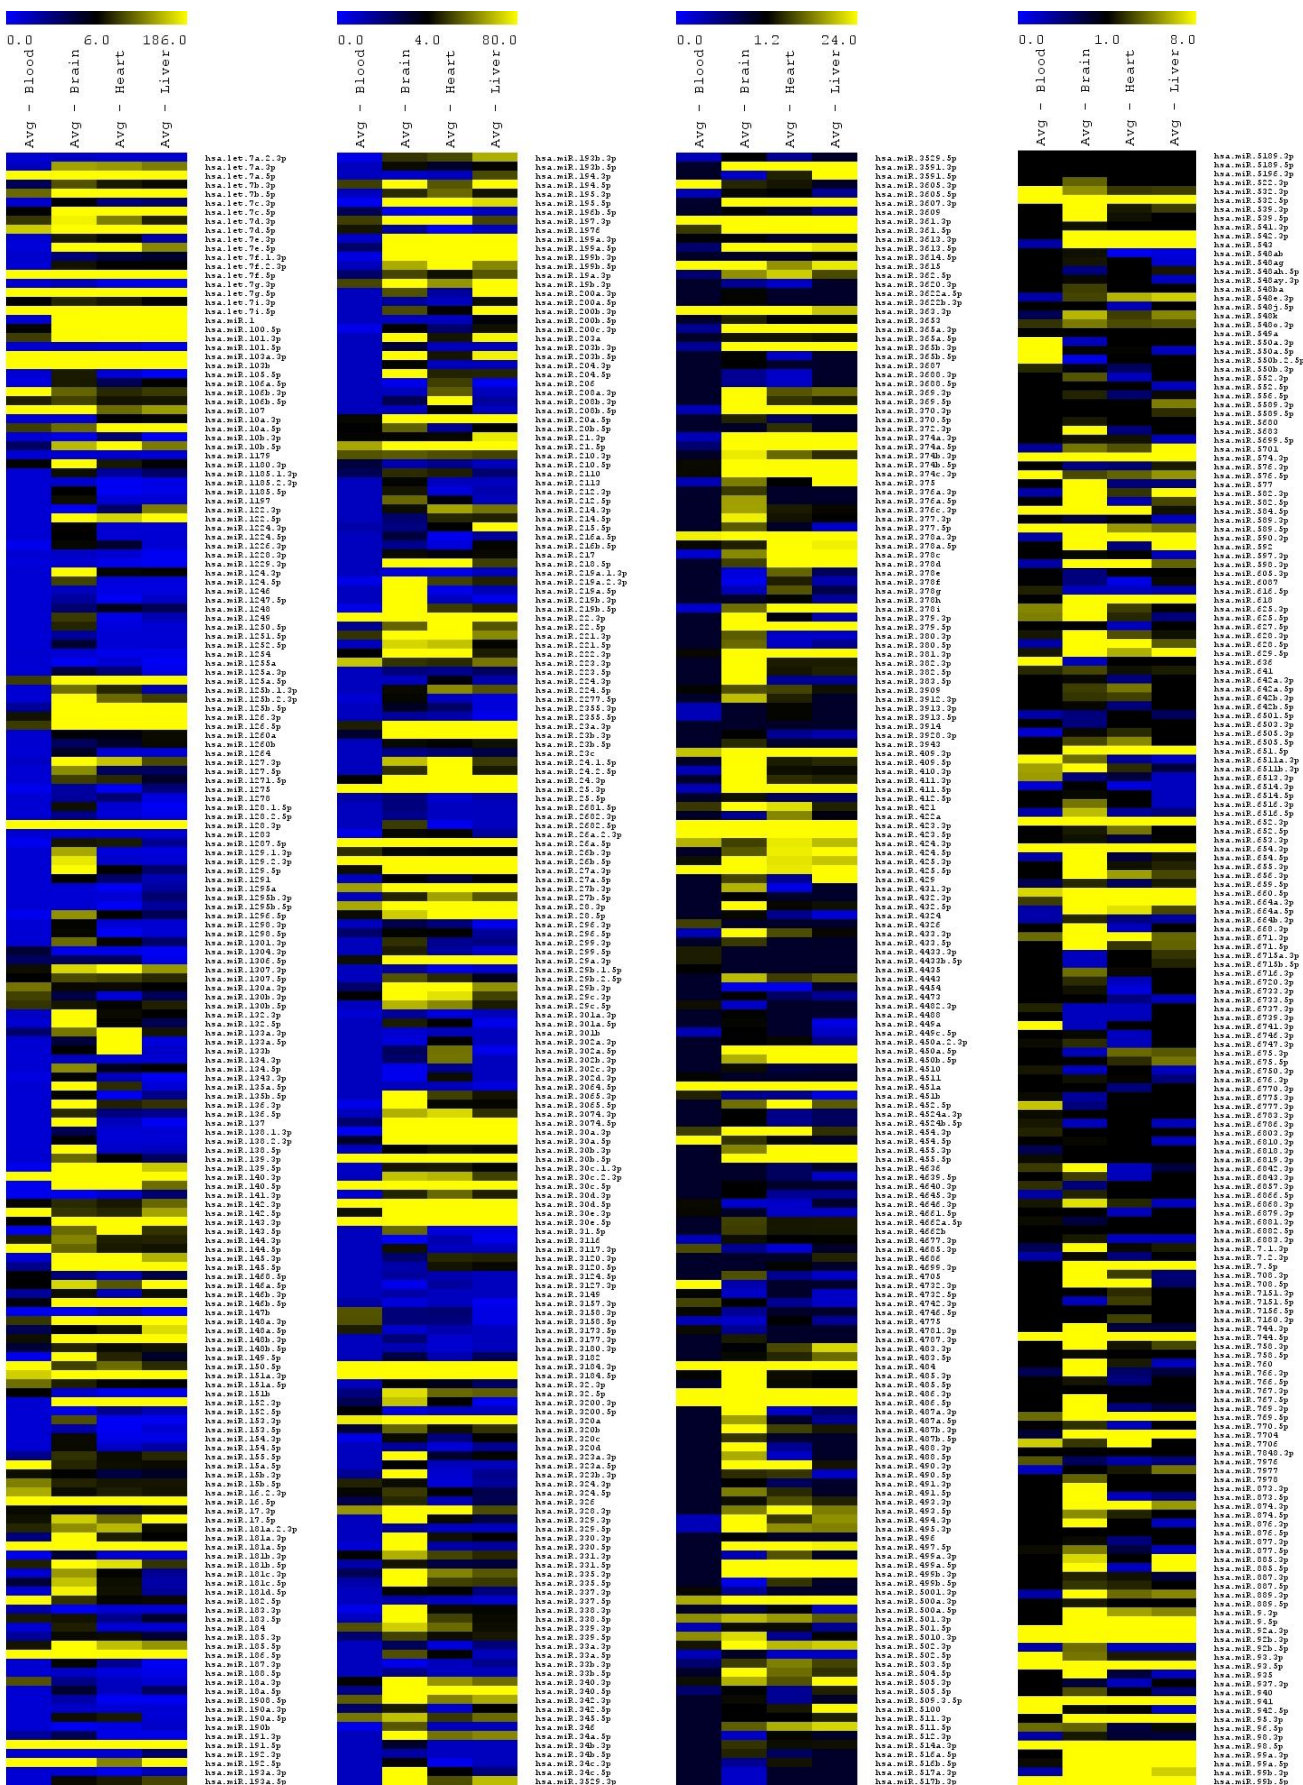

Supplement: 12920_2015_109_MOESM1_ESM.pdf [file 12920_2015_109_MOESM1_ESM.pdf]
